# Supplementary material for: Exploring the Mechanism of the Intramolecular Diels–Alder Reaction of (2E,4Z,6Z)-2(allyloxy)cycloocta-2,4,6-trien-1-one Using Bonding Evolution Theory
Source: MDPI journal article supplement (doi:10.3390/molecules28196755), 2023-09-22
Supplement: s1 [file s1]

# Exploring the Mechanism of the Intramolecular Diels–Alder Reaction of (2*E*,4*Z*,6*Z*)-2(allyloxy)cycloocta-2,4,6-trien-1-one Using Bonding Evolution Theory

Abel Idrice Adjieufack <sup>1,2,3,\*</sup>, Jean Moto Ongagna <sup>4</sup>, Jean Serge Essomba <sup>2</sup>,  
Monique Bassomo Ewonkem <sup>4</sup>, Mónica Oliva <sup>5</sup>, Vicent Sixte Safont <sup>5</sup> and Juan Andrés <sup>5,\*</sup>

- <sup>1</sup> Laboratory of Theoretical Chemistry (LCT), Namur Institute of Structured Matter (NISM), University of Namur, Rue de Bruxelles, 61, B-5000 Namur, Belgium
- <sup>2</sup> Physical and Theoretical Chemistry Laboratory, University of Yaoundé 1, Yaoundé P.O. Box 812, Cameroon; jeansergeessomba@gmail.com
- <sup>3</sup> Computational Chemistry Laboratory, High Teacher Training College, University of Yaoundé 1, Yaoundé P.O. Box 47, Cameroon
- <sup>4</sup> Department of Chemistry, Faculty of Sciences, University of Douala, Douala P.O. Box 2701, Cameroon; jean.monfils@yahoo.fr (J.M.O.); myewon@gmail.com (M.B.E.)
- <sup>5</sup> Analytical and Physical Chemistry Department, Jaume I University, Avda. Sos Baynat s/n, 12071 Castelló, Spain; oliva@uji.es (M.O.); safont@uji.es (V.S.S.)
- \* Correspondence: adjieufack21@gmail.com (A.I.A.); andres@uji.es (J.A.)

## Content

- 1- Tables
- 2- Figures
- 3- Cartesian coordinates

**Table S1-a.**  $\Delta G$  value (kcal/mol) evaluated in function of different XC DFT functionals as well as MP2 and CCSD(T) for the TSs of path-a. The basis set used in all cases was cc-pVTZ.

| Species | B3LYP | M05-2X | $\omega$ B97X-D | M06-2X | B3LYP(D3)BJ | MP2  | LC-BLYP | CCSD(T) |
|---------|-------|--------|-----------------|--------|-------------|------|---------|---------|
| TS1-a   | 56.4  | 56.7   | 56.8            | 56.6   | 55.2        | 50.3 | 62.3    | 52.9    |
| TS2-a   | 36.9  | 25.2   | 27.7            | 27.7   | 30.9        | 13.8 | 31.5    | 22.3    |

**Table S1-b.**  $\Delta\Delta G$  value with respect the reference method (CCSD(T)) evaluated in function of different XC DFT functionals as well as MP2 for the TSs of path-a. The basis set used in all cases was cc-pVTZ.

| Species | B3LYP | M05-2X | $\omega$ B97X-D | M06-2X | B3LYP(D3)BJ | MP2  | LC-BLYP |
|---------|-------|--------|-----------------|--------|-------------|------|---------|
| TS1-a   | 3.5   | 3.8    | 3.9             | 3.7    | 2.3         | -2.6 | 9.4     |
| TS2-a   | 14.6  | 2.9    | 5.4             | 5.4    | 8.6         | -8.5 | 9.2     |

**Table S1-c.** % deviation with respect the reference method in the  $\Delta G$  values evaluated in function of different XC DFT functionals as well as MP2 for the TSs of path-a.

| Species | B3LYP | M05-2X | $\omega$ B97X-D | M06-2X | B3LYP(D3)BJ | MP2   | LC-BLYP |
|---------|-------|--------|-----------------|--------|-------------|-------|---------|
| TS1-a   | 6.7   | 7.2    | 7.4             | 7.0    | 4.3         | -4.9  | 15.1    |
| TS2-a   | 65.5  | 13.0   | 24.2            | 24.2   | 38.6        | -38.1 | 41.3    |
| Average | 36.1  | 10.1   | 15.8            | 15.6   | 21.5        | -21.5 | 28.2    |

**Table S1-d.** M05-2X/cc-pVTZ electronic energies (E, Hartree·particle<sup>-1</sup>), enthalpies (H, Hartree·particle<sup>-1</sup>), entropies (S, cal·mol<sup>-1</sup>·K<sup>-1</sup>), and Gibbs free energies (G, Hartree·particle<sup>-1</sup>) for the species involved in this intramolecular Diels-Alder reaction.

| Species  | E          | H          | S       | G          |
|----------|------------|------------|---------|------------|
| <b>1</b> | -576.89732 | -576.66064 | 135.571 | -576.76179 |
| TS1-a    | -576.80443 | -576.57180 | 133.679 | -576.67153 |
| Int-a    | -576.89044 | -576.65286 | 117.541 | -576.74055 |
| TS2-a    | -576.86511 | -576.63113 | 121.063 | -576.72145 |
| <b>2</b> | -576.93942 | -576.70372 | 135.092 | -576.80450 |
| TS1-b    | -576.85077 | -576.61650 | 127.945 | -576.71195 |
| Int-b    | -576.90371 | -576.66739 | 138.582 | -576.77078 |
| TS2-b1   | -576.83862 | -576.60460 | 124.090 | -576.69718 |
| TS2-b2   | -576.81278 | -576.57855 | 120.915 | -576.66876 |
| 3-b1     | -576.93340 | -576.69558 | 122.214 | -576.78676 |
| 3-b2     | -576.87073 | -576.63266 | 118.334 | -576.72095 |
| TS1-c1   | -576.80344 | -576.56924 | 121.521 | -576.65990 |
| TS1-c2   | -576.79208 | -576.55790 | 123.864 | -576.65031 |
| 4-c1     | -576.91232 | -576.67382 | 116.395 | -576.76066 |
| 4-c2     | -576.87645 | -576.63857 | 121.205 | -576.72899 |

**Table S2.** Topological parameters values of the electron density [ $\rho(r)$ ] and its Laplacian [ $\nabla^2\rho(r)$ ],  $|V(r)|/G(r)$  ratio, and ellipticity ( $\varepsilon$ ) at the C...C and O...C critical points in the TSs along the IMDA. In addition, instantly interaction energy(Eint), Lagrangian kinetic energy[G(r)], Energy density[H(r)], QTAIM Charge[Qe] and Eigenvalues of Hessian matrix[ $\lambda_{1-3}$ ] at these previous BCPs(Bond critical points)

| TS     | BCP                | $\rho(r)$<br>(a.u) | $\nabla^2\rho(r)$<br>(a.u) | $V(r)$<br>(a.u) | Eint  | $G(r)$<br>(a.u) | $ V(r) /G(r)$ | $H(r)$<br>(a.u) | $\lambda_1$<br>(a.u) | $\lambda_2$<br>(a.u) | $\lambda_3$<br>(a.u) | Qe    | $\varepsilon$<br>(a.u) |
|--------|--------------------|--------------------|----------------------------|-----------------|-------|-----------------|---------------|-----------------|----------------------|----------------------|----------------------|-------|------------------------|
| TS1-a  | <b>C2 ... C7</b>   | 0.061              | 0.070                      | -0.044          | 0.022 | 0.031           | 1.433         | -0.013          | -0.059               | -0.051               | 0.181                | 0.330 | 0.172                  |
| TS2-a  | <b>C6 ... C13</b>  | 0.054              | 0.043                      | -0.031          | 0.016 | 0.021           | 1.488         | -0.010          | -0.052               | -0.047               | 0.142                | 0.367 | 0.106                  |
|        | <b>C3 ... C12</b>  | 0.053              | 0.049                      | -0.032          | 0.016 | 0.022           | 1.444         | -0.010          | -0.052               | -0.043               | 0.144                | 0.359 | 0.208                  |
| TS1-b  | <b>O10 ... C11</b> | 0.080              | 0.115                      | -0.069          | 0.035 | 0.049           | 1.413         | -0.020          | -0.092               | -0.104               | 0.310                | 0.295 | 0.132                  |
|        | <b>C3 ... C13</b>  | 0.065              | 0.046                      | -0.039          | 0.020 | 0.025           | 1.542         | -0.014          | -0.067               | -0.061               | 0.174                | 0.385 | 0.104                  |
| TS2-b1 | <b>C4 ... C12</b>  | 0.061              | 0.066                      | -0.041          | 0.020 | 0.029           | 1.421         | -0.012          | -0.064               | -0.039               | 0.169                | 0.380 | 0.638                  |
|        | <b>C7 ... C11</b>  | 0.020              | 0.040                      | -0.034          | 0.017 | 0.022           | 1.553         | -0.011          | -0.060               | -0.057               | 0.158                | 0.383 | 0.059                  |
| TS2-b2 | <b>O10 ... C12</b> | 0.049              | 0.109                      | -0.091          | 0.046 | 0.059           | 1.540         | -0.032          | -0.132               | -0.123               | 0.365                | 0.362 | 0.068                  |
|        | <b>O9 ... C11</b>  | 0.083              | 0.102                      | -0.070          | 0.035 | 0.048           | 1.468         | -0.022          | -0.113               | -0.103               | 0.317                | 0.357 | 0.104                  |
| TS1-c1 | <b>C4 ... C12</b>  | 0.048              | 0.041                      | -0.027          | 0.014 | 0.019           | 1.460         | -0.009          | -0.045               | -0.041               | 0.126                | 0.356 | 0.107                  |
|        | <b>C7 ... C13</b>  | 0.051              | 0.041                      | -0.029          | 0.014 | 0.019           | 1.474         | -0.009          | -0.049               | -0.043               | 0.133                | 0.369 | 0.369                  |
| TS1-c2 | <b>C2 ... C12</b>  | 0.046              | 0.034                      | -0.024          | 0.012 | 0.016           | 1.482         | -0.008          | -0.042               | -0.040               | 0.117                | 0.361 | 0.047                  |
|        | <b>C5 ... C13</b>  | 0.085              | 0.062                      | -0.060          | 0.030 | 0.038           | 1.589         | -0.022          | -0.078               | -0.102               | 0.241                | 0.322 | 0.312                  |

**Table S3.** Basin Populations ( $e$ ), IRC coordinates (RX,  $\text{amu}^{1/2}$  Bohr), C2–C7 bond lengths ( $\text{\AA}$ ), and energy (kcal/mol) with respect to the beginning of SSD-I along the **TS1-a** reaction pathway. For each SSD, the first value corresponds to the beginning of the domain while the second to its end. C and F mean “Fold and Cusp” catastrophes.

| Basins              | SSD-I |       | SSD-II   |          | SSD-III  |          |
|---------------------|-------|-------|----------|----------|----------|----------|
| V(C2,C3)            | 3.63  | 2.96  | 2.63     | 2.30     | 2.27     | 2.10     |
| V(C3,C4)            | 2.12  | 2.99  | 3.03     | 3.24     | 3.26     | 3.37     |
| V(C4,C5)            | 3.42  | 2.85  | 2.79     | 2.37     | 2.35     | 2.22     |
| V(C5,C6)            | 2.12  | 2.75  | 2.84     | 3.22     | 3.24     | 3.37     |
| V(C6,C7)            | 3.48  | 2.88  | 2.77     | 2.30     | 2.27     | 2.11     |
| V(C2)               | -     | -     | 0.31     | 0.66     | -        | -        |
| V(C7)               | -     | -     | 0.26     | 0.69     | -        | -        |
| V(C2,C7)            | -     | -     | -        | -        | 1.44     | 1.92     |
| <i>Catastrophes</i> | -     | -     | <i>F</i> | <i>F</i> | <i>C</i> | <i>C</i> |
| <i>d(C2-C7)</i>     | 2.606 | 2.094 | 2.067    | 1.886    | 1.859    | 1.569    |
| <b>E kcal/mol</b>   | 0.00  | 13.34 | 12.78    | 1.99     | -0.36    | -40.65   |
| <b>Rx</b>           | 6.74  | -0.32 | -0.48    | -1.60    | -1.76    | -15.72   |

**Table S4.** Basin Populations ( $e$ ), IRC coordinates (RX,  $\text{amu}^{1/2}$  Bohr), C3–C12/C6–C13 bond lengths ( $\text{\AA}$ ), and energy (kcal/mol) with respect to the beginning of SSD-I along the **TS2-a** reaction pathway. For each SSD, the first value corresponds to the beginning of the domain while the second to its end. C and F mean “Fold and Cusp” catastrophes.

| Basins              | SSD-I  |       | SSD-II    |           | SSD-III     |             | SSD-IV    |           | SSD-V     |           |
|---------------------|--------|-------|-----------|-----------|-------------|-------------|-----------|-----------|-----------|-----------|
| V(C3,C4)            | 3.35   | 3.07  | 3.02      | 3.02      | 2.71        | 2.45        | 2.39      | 2.32      | 2.28      | 2.08      |
| V(C4,C5)            | 2.25   | 2.72  | 2.98      | 2.98      | 2.91        | 3.17        | 3.22      | 3.26      | 3.29      | 3.40      |
| V(C5,C6)            | 3.35   | 3.07  | 2.98      | 2.98      | 2.66        | 2.38        | 2.31      | 2.26      | 2.23      | 2.06      |
| V(C12,C13)          | 3.42   | 3.29  | 2.84      | 2.84      | 2.72        | 2.38        | 2.31      | 2.23      | 2.16      | 1.94      |
| V(C3)               | -      | -     | -         | -         | 0.29        | 0.51        | 0.56      | 0.61      | -         | -         |
| V(C6)               | -      | -     | -         | -         | 0.26        | 0.51        | -         | -         | -         | -         |
| V(C12)              | -      | -     | 0.21      | 0.21      | 0.27        | 0.46        | 0.52      | 0.57      | -         | -         |
| V(C13)              | -      | -     | 0.25      | 0.25      | 0.33        | 0.56        | -         | -         | -         | -         |
| V(C3,C12)           | -      | -     | -         | -         | -           | -           | -         | -         | 1.28      | 1.79      |
| V(C6,C13)           | -      | -     | -         | -         | -           | -           | 1.20      | 1.31      | 1.41      | 1.83      |
| <i>Catastrophes</i> |        |       | <i>FF</i> | <i>FF</i> | <i>FFFF</i> | <i>FFFF</i> | <i>CF</i> | <i>CF</i> | <i>CC</i> | <i>CC</i> |
| <i>d(C3-C12)</i>    | 3.235  | 2.250 | 2.208     | 2.208     | 2.166       | 2.039       | 1.997     | 1.954     | 1.911     | 1.555     |
| <i>d(C6-C13)</i>    | 3.655  | 2.229 | 2.184     | 2.184     | 2.137       | 1.999       | 1.954     | 1.908     | 1.863     | 1.554     |
| <b>E kcal/mol</b>   | 0.00   | 14.43 | 14.22     | 14.22     | 13.53       | 7.70        | 4.38      | 0.48      | -3.85     | -32.17    |
| <b>Rx</b>           | -10.47 | 0.00  | 0.30      | 0.30      | 0.60        | 1.50        | 1.79      | 2.09      | 2.40      | 6.86      |

**Table S5.** Basin Populations ( $e$ ), IRC coordinates (RX,  $\text{amu}^{1/2}$  Bohr), C3–C13 bond lengths ( $\text{\AA}$ ), and energy (kcal/mol) with respect to the beginning of SSD-I along the **TS1-b** reaction pathway. For each SSD, the first value corresponds to the beginning of the domain while the second to its end. C and F mean “Fold and Cusp” catastrophes.

| Basins              | SSD-I  |       | SSD-II |       | SSD-III   |           | SSD-IV   |          |
|---------------------|--------|-------|--------|-------|-----------|-----------|----------|----------|
| V(C2,C3)            | 3.43   | 3.33  | 3.30   | 3.20  | 2.83      | 2.62      | 2.45     | 2.08     |
| V(C2,O10)           | 1.47   | 1.57  | 1.61   | 1.85  | 1.93      | 2.07      | 2.19     | 2.43     |
| V(O10,C11)          | 1.20   | 0.63  | -      | -     | -         | -         | -        | -        |
| V(C11,C12)          | 2.05   | 2.24  | 2.29   | 2.88  | 3.00      | 3.12      | 3.18     | 3.45     |
| V(C12,C13)          | 3.45   | 3.29  | 3.26   | 2.90  | 2.58      | 2.39      | 2.31     | 2.03     |
| V(O10)              | 4.88   | 5.26  | 5.85   | 5.45  | 5.42      | 5.32      | 5.29     | 5.16     |
| V(C3)               | -      | -     | -      | -     | 0.34      | 0.52      | -        | -        |
| V(C13)              | -      | -     | -      | -     | 0.23      | 0.36      | -        | -        |
| V(C3,C13)           | -      | -     | -      | -     | -         | -         | 1.03     | 1.84     |
| <i>Catastrophes</i> |        |       |        |       | <i>FF</i> | <i>FF</i> | <i>C</i> | <i>C</i> |
| <i>d(O10-C11)</i>   | 1.444  | 1.648 | 1.696  | 1.942 | 1.989     | 2.079     | 2.162    | 4.104    |
| <i>d(C3-C13)</i>    | 3.826  | 2.352 | 2.313  | 2.116 | 2.075     | 1.985     | 1.889    | 1.541    |
| <b>E kcal/mol</b>   | 0.00   | 19.73 | 22.14  | 28.71 | 28.43     | 26.18     | 24.31    | -4.48    |
| <b>Rx</b>           | -14.15 | -1.89 | -1.57  | 0.00  | 0.31      | 0.94      | 1.26     | 15.41    |

**Table S6.** Basin Populations ( $e$ ), IRC coordinates (RX,  $\text{amu}^{1/2}$  Bohr), C4–C12/C7–C11 bond lengths ( $\text{\AA}$ ), and energy (kcal/mol) with respect to the beginning of SSD-I along the **TS2-b1** reaction pathway. For each SSD, the first value corresponds to the beginning of the domain while the second to its end. C and F mean “Fold and Cusp” catastrophes.

| Basins              | SSD-I |       | SSD-II    |           | SSD-III    |            | SSD-IV      |             | SSD-V      |            | SSD-VI    |           |
|---------------------|-------|-------|-----------|-----------|------------|------------|-------------|-------------|------------|------------|-----------|-----------|
| V(C4,C5)            | 3.46  | 3.17  | 3.13      | 3.13      | 3.09       | 3.09       | 2.67        | 2.42        | 2.37       | 2.37       | 2.32      | 2.10      |
| V(C5,C6)            | 2.17  | 2.69  | 2.79      | 2.79      | 2.90       | 2.90       | 3.01        | 3.20        | 3.25       | 3.25       | 3.29      | 3.44      |
| V(C6,C7)            | 3.47  | 3.15  | 2.78      | 2.78      | 2.67       | 2.67       | 2.56        | 2.33        | 2.28       | 2.28       | 2.24      | 2.04      |
| V(C11,C12)          | 3.44  | 3.30  | 3.03      | 3.03      | 2.74       | 2.74       | 2.63        | 2.35        | 2.28       | 2.28       | 2.21      | 1.93      |
| V(C4)               | -     | -     | -         | -         | -          | -          | 0.38        | 0.57        | 0.61       | 0.61       | -         | -         |
| V(C7)               | -     | -     | 0.37      | 0.37      | 0.40       | 0.40       | 0.46        | 0.65        | -          | -          | -         | -         |
| V(C11)              | -     | -     | 0.28      | 0.28      | 0.36       | 0.36       | 0.41        | 0.61        | -          | -          | -         | -         |
| V(C12)              | -     | -     | -         | -         | 0.25       | 0.25       | 0.31        | 0.49        | 0.54       | 0.54       | -         | -         |
| V(C4,C12)           | -     | -     | -         | -         |            |            | -           | -           | -          | -          | 1.24      | 1.84      |
| V(C7,C11)           | -     | -     | -         | -         |            |            | -           | -           | 1.33       | 1.33       | 1.41      | 1.90      |
| <i>Catastrophes</i> |       |       | <i>FF</i> | <i>FF</i> | <i>FFF</i> | <i>FFF</i> | <i>FFFF</i> | <i>FFFF</i> | <i>CFE</i> | <i>CFE</i> | <i>CC</i> | <i>CC</i> |
| <i>d(C4-C12)</i>    | 3.382 | 2.203 | 2.170     | 2.170     | 2.137      | 2.137      | 2.103       | 2.002       | 1.968      | 1.968      | 1.933     | 1.544     |
| <i>d(C7-C11)</i>    | 4.360 | 2.216 | 2.180     | 2.180     | 2.144      | 2.144      | 2.108       | 2.002       | 1.967      | 1.967      | 1.932     | 1.555     |
| <b>E kcal/mol</b>   | 0.00  | 43.80 | 44.04     | 44.04     | 43.78      | 43.78      | 42.96       | 36.78       | 33.55      | 33.55      | 29.86     | -10.60    |
| <b>Rx</b>           | 22.18 | 0.24  | 0.00      | 0.00      | -0.24      | -0.24      | -0.48       | -1.22       | -1.33      | -1.33      | -1.71     | -6.81     |

**Table S7.** Basin Populations (e), IRC coordinates (RX, amu<sup>1/2</sup> Bohr), O9–C11/O10–C11 bond lengths (Å), and energy (kcal/mol) with respect to the beginning of SSD-I along the **TS2-b2** reaction pathway. For each SSD, the first value corresponds to the beginning of the domain while the second to its end. C means “Cusp” catastrophes.

| Basins              | SSD-I  |       | SSD-II |       | SSD-III |       |
|---------------------|--------|-------|--------|-------|---------|-------|
| V(C1,C2)            | 2.19   | 3.79  | 3.84   | 3.90  | 3.93    | 4.00  |
| V(C1,O9)            | 2.43   | 1.71  | 1.64   | 1.60  | 1.55    | 1.46  |
| V(C2,O10)           | 2.44   | 1.56  | 1.51   | 1.47  | 1.42    | 1.34  |
| V(C11,C12)          | 3.45   | 2.23  | 2.19   | 2.16  | 2.12    | 2.02  |
| V(O9)               | 5.25   | 5.76  | 5.82   | 5.88  | 5.13    | 4.92  |
| V(O10)              | 5.24   | 5.85  | 5.31   | 5.29  | 5.23    | 5.04  |
| V(O9,C11)           |        |       |        |       | 0.79    | 1.21  |
| V(O10,C12)          |        |       | 0.64   | 0.75  | 0.85    | 1.22  |
| <i>Catastrophes</i> | -      | -     | C      | C     | CC      | CC    |
| <i>d</i> (O10,C12)  | 3.722  | 1.706 | 1.664  | 1.623 | 1.582   | 1.433 |
| <i>d</i> (O9-C11)   | 3.351  | 1.783 | 1.743  | 1.703 | 1.662   | 1.456 |
| E kcal/mol          | 0.00   | 48.25 | 43.94  | 39.33 | 34.74   | 20.68 |
| Rx                  | -18.22 | 1.21  | 1.52   | 1.82  | 2.13    | 4.22  |

**Table S8.** Basin Populations (e), IRC coordinates (RX, amu<sup>1/2</sup> Bohr), C4–C12/C7–C13 bond lengths (Å), and energy (kcal/mol) with respect to the beginning of SSD-I along the **TS1-c1** reaction pathway. For each SSD, the first value corresponds to the beginning of the domain while the second to its end. C and F mean “Fold and Cusp” catastrophes.

| Basins              | SSD-I  |       | SSD-II |       | SSD-III |       | SSD-IV |       | SSD-V |       |
|---------------------|--------|-------|--------|-------|---------|-------|--------|-------|-------|-------|
| V(C4,C5)            | 3.34   | 3.08  | 3.03   | 3.03  | 2.70    | 2.28  | 2.23   | 2.23  | 2.20  | 2.01  |
| V(C5,C6)            | 2.25   | 2.75  | 2.82   | 2.82  | 2.93    | 3.29  | 3.36   | 3.36  | 3.37  | 3.44  |
| V(C6,C7)            | 3.44   | 3.12  | 3.08   | 3.08  | 2.71    | 2.26  | 2.25   | 2.25  | 2.20  | 2.06  |
| V(C12,C13)          | 3.42   | 3.32  | 3.09   | 3.09  | 2.75    | 2.23  | 2.18   | 2.18  | 2.13  | 1.90  |
| V(C4)               | -      | -     | -      | -     | 0.30    | 0.63  | 0.67   | 0.67  | -     | -     |
| V(C7)               | -      | -     | -      | -     | 0.33    | 0.77  | -      | -     | -     | -     |
| V(C12)              | -      | -     | -      | -     | 0.29    | 0.60  | 0.64   | 0.64  | -     | -     |
| V(C13)              | -      | -     | 0.23   | 0.23  | 0.31    | 0.55  | -      | -     | -     | -     |
| V(C4,C12)           | -      | -     | -      | -     | -       | -     | -      | -     | 1.38  | 1.91  |
| V(C7,C13)           | -      | -     | -      | -     | -       | -     | 1.41   | 1.41  | 1.47  | 1.91  |
| <i>Catastrophes</i> | -      | -     | F      | F     | FFFF    | FFFF  | CF     | CF    | CC    | CC    |
| <i>d</i> (C4-C12)   | 3.567  | 2.309 | 2.274  | 2.274 | 2.239   | 2.025 | 1.989  | 1.989 | 1.953 | 1.544 |
| <i>d</i> (C7-C13)   | 3.730  | 2.271 | 2.233  | 2.233 | 2.196   | 1.970 | 1.933  | 1.933 | 1.896 | 1.545 |
| E kcal/mol          | 0.00   | 28.67 | 28.46  | 28.46 | 27.82   | 12.34 | 8.00   | 8.00  | 3.39  |       |
| Rx                  | -14.50 | 0.00  | 0.25   | 0.25  | 0.51    | 2.04  | 2.29   | 2.29  | 2.54  | 9.40  |

**Table S9.** Basin Populations (e), IRC coordinates (RX, amu<sup>1/2</sup> Bohr), C2–C12/C5–C13 bond lengths (Å), and energy (kcal/mol) with respect to the beginning of SSD-I along the **TS1-c2** reaction pathway. For each SSD, the first value corresponds to the beginning of the domain while the second to its end. C and F mean “Fold and Cusp” catastrophes.

| Basins              | SSD-I  |       | SSD-II    |           | SSD-III     |             | SSD-IV     |            | SSD-V     |           |
|---------------------|--------|-------|-----------|-----------|-------------|-------------|------------|------------|-----------|-----------|
| V(C2,C3)            | 3.60   | 3.14  | 2.74      | 2.74      | 2.64        | 2.46        | 2.39       | 2.25       | 2.24      | 2.11      |
| V(C3,C4)            | 2.19   | 2.80  | 2.88      | 2.88      | 2.95        | 3.11        | 3.15       | 3.32       | 3.35      | 3.45      |
| V(C4,C5)            | 3.38   | 3.10  | 3.07      | 3.07      | 2.72        | 2.53        | 2.45       | 2.26       | 2.22      | 1.99      |
| V(C12,C13)          | 3.41   | 3.38  | 3.09      | 3.09      | 2.78        | 2.55        | 2.49       | 2.22       | 2.18      | 1.97      |
| V(C2)               | -      | -     | 0.39      | 0.39      | 0.42        | 0.62        | -          | -          | -         | -         |
| V(C5)               | -      | -     | -         | -         | 0.30        | 0.41        | 0.46       | 0.63       | -         | -         |
| V(C12)              | -      | -     | 0.29      | 0.29      | 0.37        | 0.48        | -          | -          | -         | -         |
| V(C13)              | -      | -     | -         | -         | 0.26        | 0.38        | 0.43       | 0.59       | -         | -         |
| V(C2,C12)           |        |       |           |           |             |             | 1.25       | 1.57       | 1.63      | 1.89      |
| V(C5,C13)           |        |       |           |           |             |             |            |            | 1.30      | 1.85      |
| <i>Catastrophes</i> |        |       | <i>FF</i> | <i>FF</i> | <i>FFFF</i> | <i>FFFF</i> | <i>CFF</i> | <i>CFF</i> | <i>CC</i> | <i>CC</i> |
| <i>d(C2-C12)</i>    | 2.975  | 2.203 | 1.992     | 1.992     | 1.957       | 1.889       | 1.854      | 1.722      | 1.693     | 1.518     |
| <i>d(C5-C13)</i>    | 4.222  | 2.378 | 2.345     | 2.345     | 2.313       | 2.248       | 2.217      | 2.081      | 2.044     | 1.572     |
| <b>E kcal/mol</b>   | 0.00   | 52.74 | 52.95     | 52.95     | 52.72       | 50.75       | 48.96      | 37.47      | 33.98     | 0.03      |
| <b>Rx</b>           | -22.53 | -0.24 | 0.00      | 0.00      | 0.24        | 0.72        | 0.96       | 1.92       | 2.16      | 7.89      |

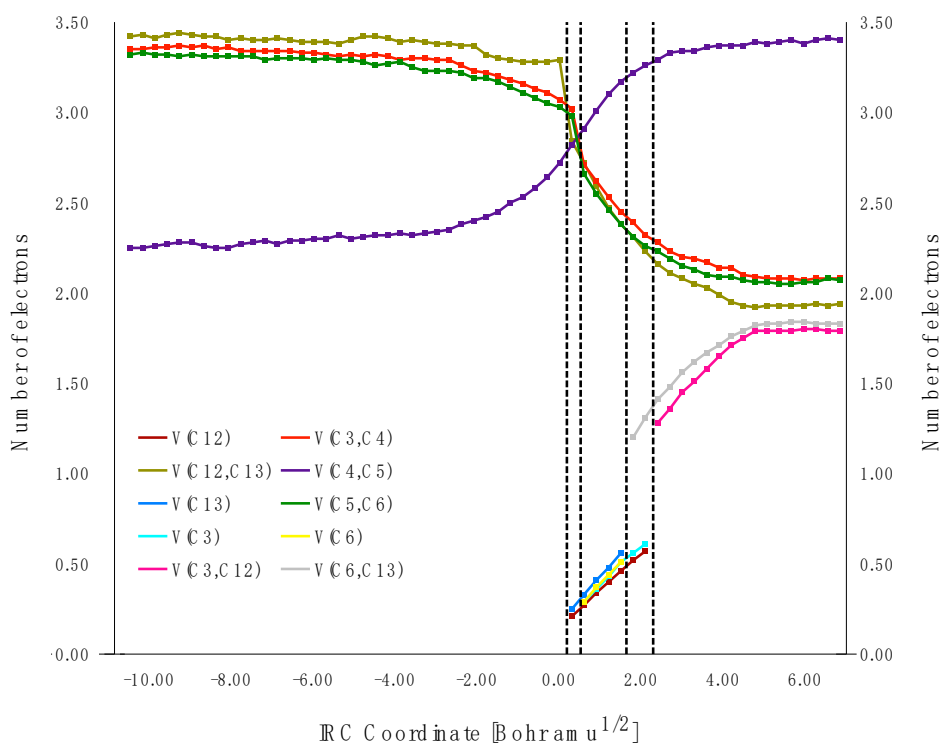

**Figure S1.** Population evolution (in e) of selected basins along the IRC associated to **TS2-a**

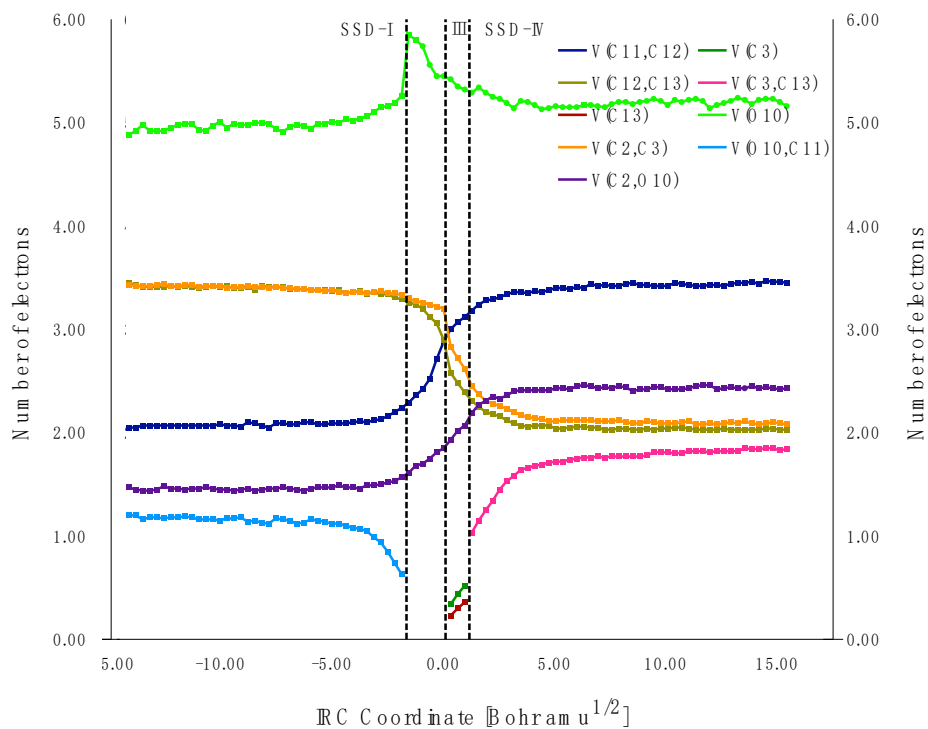

**Figure S2.** Population evolution (in e) of selected basins along the IRC associated to **TS1-b**

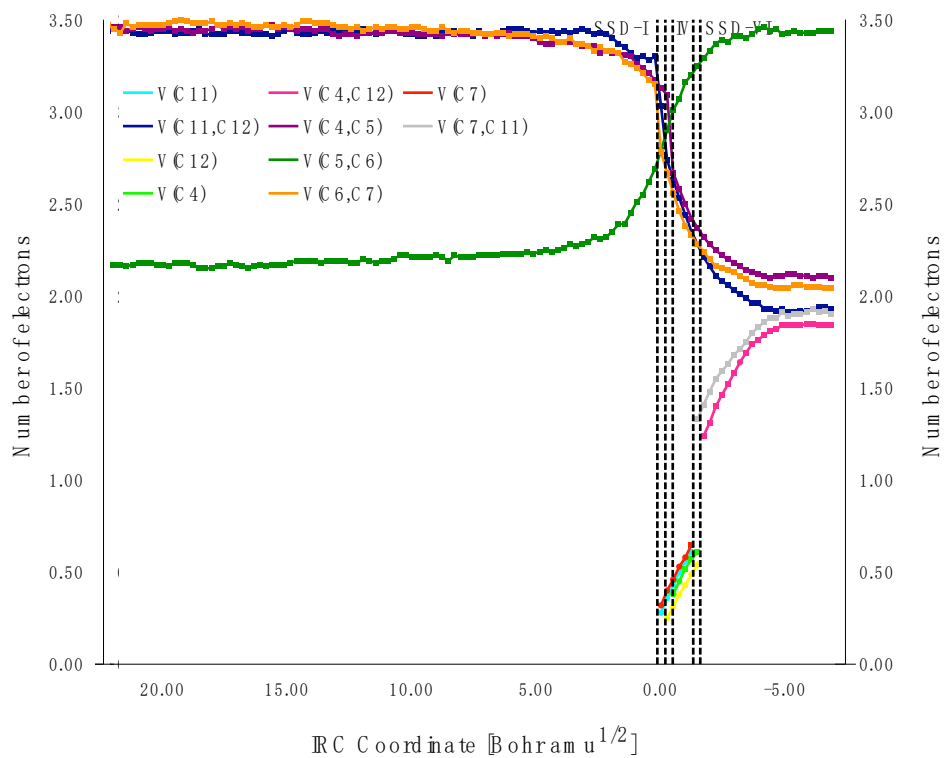

**Figure S3.** Population evolution (in e) of selected basins along the IRC associated to **TS2-b1**



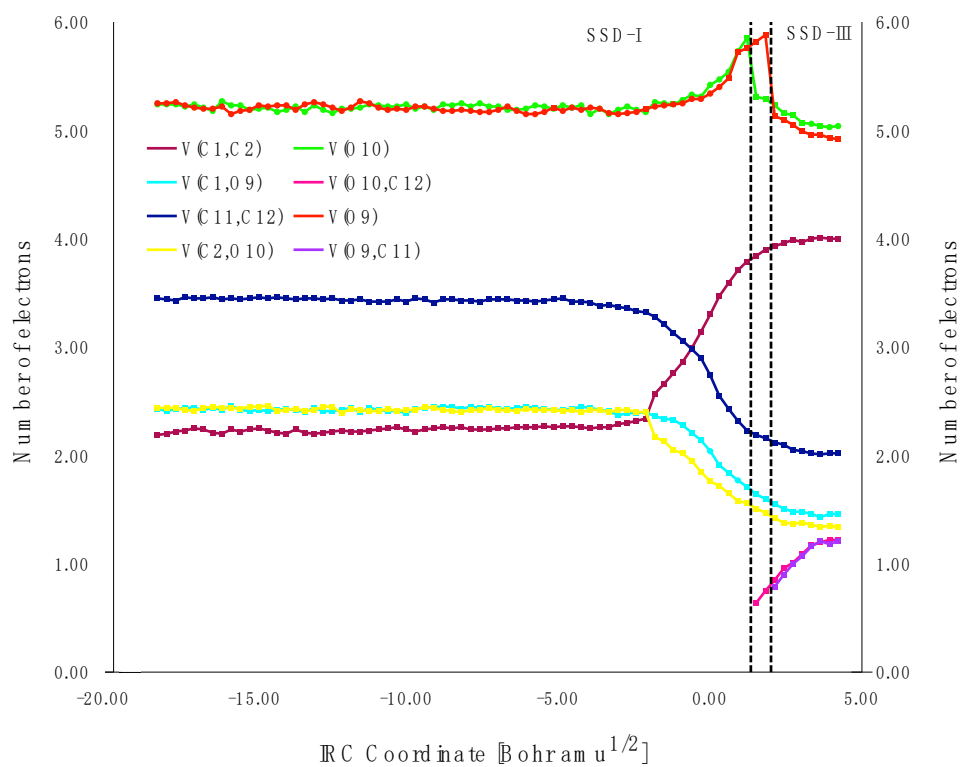

**Figure S4.** Population evolution (in e) of selected basins along the IRC associated to **TS2-b2**

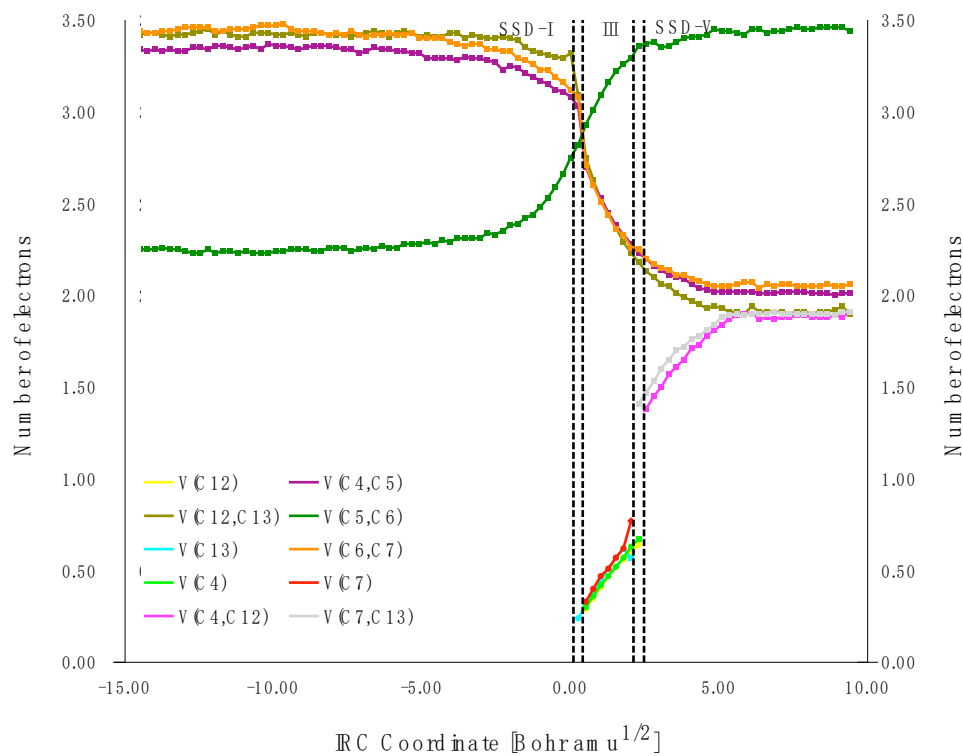

**Figure S5.** Population evolution (in e) of selected basins along the IRC associated to **TS1-c1**

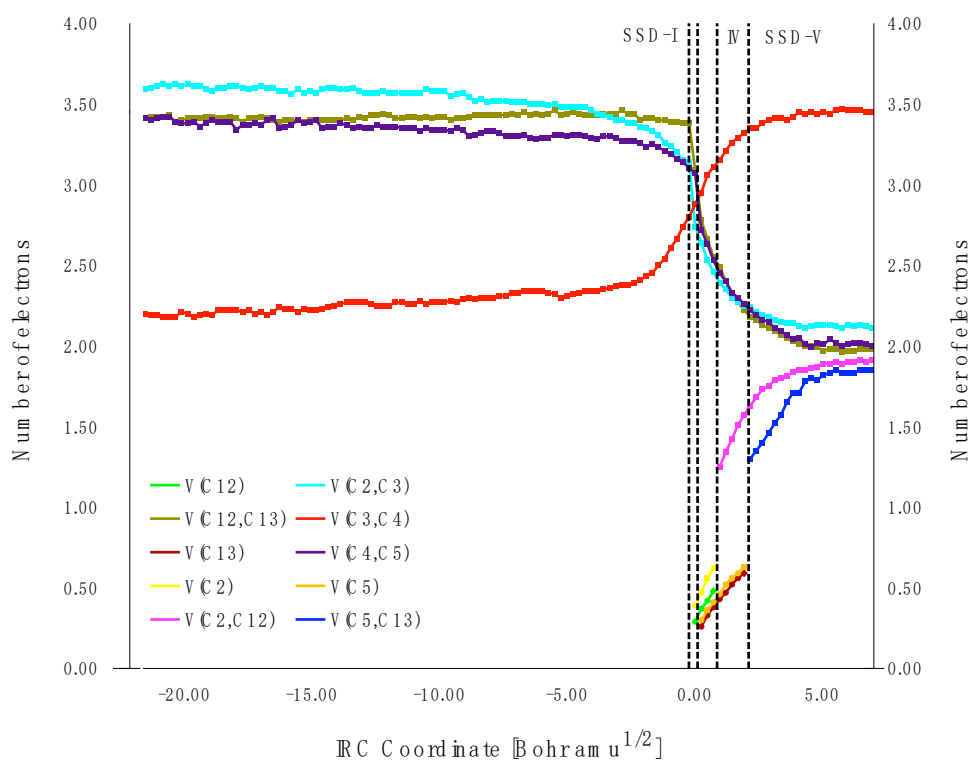

**Figure S6.** Population evolution (in e) of selected basins along the IRC associated to TS1-c2

### Cartesian coordinates of the stationary points found

| 1 |             |             |             |
|---|-------------|-------------|-------------|
| C | 0.11582100  | 0.49620300  | -1.16173800 |
| C | -1.25976700 | 1.10392000  | -1.20536200 |
| C | -1.58666400 | 1.56776900  | 0.17529800  |
| C | -2.32900100 | 0.85908600  | 1.02746200  |
| C | -2.82824800 | -0.46708300 | 0.75284100  |
| C | 0.25796100  | -0.82486200 | -0.49945600 |
| C | -0.73000500 | -1.63274600 | -0.06525600 |
| C | -2.14318800 | -1.49203800 | 0.21098800  |
| O | 1.06814400  | 1.05204300  | -1.66096400 |
| O | 1.49656500  | -1.39759200 | -0.55902700 |
| C | 2.60609300  | -0.65456100 | -0.00937800 |
| C | 2.27235300  | -0.05842700 | 1.31764400  |
| C | 2.35295500  | 1.23960800  | 1.55713500  |
| H | -1.98600700 | 0.36364200  | -1.53357800 |
| H | -1.21700600 | 1.93353600  | -1.90290100 |
| H | -1.22032900 | 2.54102100  | 0.46775500  |
| H | -2.61971100 | 1.30806800  | 1.96756200  |
| H | -3.83300200 | -0.68346400 | 1.09025100  |
| H | -0.36480900 | -2.63131500 | 0.14458000  |
| H | -2.68022400 | -2.42864400 | 0.14296700  |
| H | 2.92203200  | 0.11093600  | -0.70716300 |

|   |            |             |            |
|---|------------|-------------|------------|
| H | 3.38555900 | -1.40426100 | 0.09321700 |
| H | 1.95140100 | -0.74298600 | 2.09202100 |
| H | 2.64833900 | 1.92533900  | 0.77567600 |
| H | 2.12622300 | 1.65131000  | 2.52847300 |

**TS1-a**

|   |             |             |             |
|---|-------------|-------------|-------------|
| C | -0.99261900 | 2.38344800  | 0.14928600  |
| C | -0.62550500 | 1.88783900  | -1.10339900 |
| C | -1.46878500 | -1.47180700 | -0.09516800 |
| C | -0.40662300 | -0.50814300 | -0.59964800 |
| H | -0.61659400 | 2.62166800  | -1.89892100 |
| H | -1.20522100 | 3.44260600  | 0.18429600  |
| C | -1.54066400 | 1.53161500  | 1.13520700  |
| H | -2.51582000 | 1.79400900  | 1.53028500  |
| C | -0.99336600 | 0.28692400  | 1.30242700  |
| H | 0.07660000  | 0.26754500  | 1.37842300  |
| C | -1.66331100 | -1.06656300 | 1.38045800  |
| H | -1.17542000 | -1.76342100 | 2.05681500  |
| H | -2.72908500 | -1.03801600 | 1.58982500  |
| O | -2.16819300 | -2.18282300 | -0.75501600 |
| C | -0.71582800 | 0.52857100  | -1.47541000 |
| H | -1.38932100 | 0.30463000  | -2.29490000 |
| O | 0.84084600  | -0.85774600 | -0.20702200 |
| C | 1.89129800  | 0.07962700  | -0.46954600 |
| C | 3.17721100  | -0.57046700 | -0.09542300 |
| H | 1.72649300  | 0.99300700  | 0.10478100  |
| H | 1.85567000  | 0.33740500  | -1.52845600 |
| C | 4.06302400  | -0.00828400 | 0.70771600  |
| H | 3.36601000  | -1.53853500 | -0.53829200 |
| H | 3.87481800  | 0.95543000  | 1.15895500  |
| H | 5.00165800  | -0.48834200 | 0.93450000  |

**TS2-a**

|   |             |             |             |
|---|-------------|-------------|-------------|
| C | 0.88433500  | -2.05409200 | 0.50231300  |
| C | 0.52683000  | -1.20362000 | 1.54527900  |
| C | -2.04024000 | 0.17483800  | 0.04012300  |
| C | -0.53266400 | 0.48233100  | -0.00327300 |
| H | 0.75892400  | -1.47518700 | 2.56356700  |
| H | 1.44044100  | -2.95562300 | 0.70840200  |
| C | 0.72815200  | -1.59616700 | -0.79030600 |
| H | 1.12968500  | -2.16452800 | -1.61548200 |
| C | -0.41072800 | -0.67522500 | -1.05514700 |
| H | -0.39123900 | -0.25436500 | -2.05511000 |
| C | -1.83817300 | -1.15496700 | -0.67928200 |
| H | -2.52685600 | -1.35174300 | -1.49374400 |
| H | -1.83461500 | -1.98880100 | 0.01848000  |
| O | -2.98849300 | 0.79619200  | 0.39708300  |
| C | 0.13952800  | 0.09253500  | 1.26812700  |
| H | 0.00821000  | 0.79411800  | 2.08060800  |
| O | -0.20735800 | 1.77315000  | -0.40981000 |
| C | 1.12986600  | 2.13694900  | -0.03506800 |

|   |            |             |             |
|---|------------|-------------|-------------|
| C | 1.95580900 | 0.90768500  | 0.21877400  |
| H | 1.09656400 | 2.76365000  | 0.85385100  |
| H | 1.52070400 | 2.72621500  | -0.86028100 |
| C | 2.25387700 | 0.02954100  | -0.79686700 |
| H | 2.54497900 | 0.88541400  | 1.12113600  |
| H | 1.95340000 | 0.27254000  | -1.80605200 |
| H | 3.08706000 | -0.64527900 | -0.70160100 |

**TS1-b**

|   |             |             |             |
|---|-------------|-------------|-------------|
| C | 0.18426400  | 1.51722100  | 0.26609500  |
| C | 1.68295800  | 1.45211400  | 0.40421300  |
| C | 2.15242200  | 0.76509300  | -0.84077700 |
| C | 2.36247600  | -0.54702500 | -0.93065600 |
| C | 2.16448900  | -1.49245900 | 0.15457200  |
| C | -0.63675900 | 0.38512900  | 0.82316200  |
| C | -0.21027200 | -0.95047600 | 0.95783500  |
| C | 1.10746500  | -1.59695300 | 0.97180800  |
| O | -0.36051600 | 2.43608400  | -0.29644100 |
| O | -1.86867400 | 0.63404300  | 0.98072100  |
| C | -2.73501900 | 0.15398200  | -0.68971900 |
| C | -2.39396100 | -1.18458400 | -0.71391600 |
| C | -1.06298500 | -1.53338100 | -0.88917300 |
| H | 1.97072900  | 0.88726900  | 1.28653900  |
| H | 2.05923600  | 2.46862200  | 0.45168600  |
| H | 2.30552400  | 1.38942400  | -1.70876700 |
| H | 2.76922100  | -0.94360000 | -1.85169900 |
| H | 2.94881300  | -2.22633100 | 0.28666800  |
| H | -0.93381100 | -1.51078900 | 1.53085900  |
| H | 1.16337400  | -2.39685300 | 1.69848700  |
| H | -2.15869400 | 0.88037600  | -1.24120700 |
| H | -3.73354100 | 0.45751400  | -0.42361700 |
| H | -3.06800900 | -1.90092100 | -0.26781700 |
| H | -0.42032200 | -0.91092900 | -1.49337200 |
| H | -0.75947000 | -2.56677400 | -0.82266100 |

**TS2-b1**

|   |             |             |             |
|---|-------------|-------------|-------------|
| C | -1.60534300 | -0.56318400 | 0.14117600  |
| C | -1.73291800 | 0.37816200  | -1.01094600 |
| C | -0.76544600 | 1.54533600  | -0.89430000 |
| C | -0.42919300 | 2.13783500  | 0.31463400  |
| C | 0.25752100  | 1.54495700  | 1.36551800  |
| C | -0.36613600 | -1.41902100 | 0.03106700  |
| C | 0.84294800  | -1.06716600 | 0.84206200  |
| C | 0.97356900  | 0.35605100  | 1.38162500  |
| O | -2.37634200 | -0.67367800 | 1.05552900  |
| O | -0.38711700 | -2.34495900 | -0.74184300 |
| C | 1.16980900  | 0.76182700  | -1.52122600 |
| C | 2.03299600  | 0.36040000  | -0.51208900 |
| C | 2.07943100  | -1.08791200 | -0.04956800 |
| H | -2.74160100 | 0.78776600  | -1.00587800 |

|   |             |             |             |
|---|-------------|-------------|-------------|
| H | -1.57798400 | -0.17699200 | -1.93510600 |
| H | -0.93603200 | 2.24528000  | -1.70258000 |
| H | -0.43271500 | 3.21966500  | 0.33958100  |
| H | 0.55477900  | 2.23324900  | 2.14463600  |
| H | 0.85052600  | -1.78901700 | 1.66260500  |
| H | 1.72023600  | 0.34541000  | 2.16777200  |
| H | 1.38331700  | 1.68361100  | -2.03601700 |
| H | 0.69896100  | -0.00418200 | -2.12185100 |
| H | 2.84800200  | 1.01230400  | -0.24108000 |
| H | 2.97362600  | -1.26956200 | 0.53896600  |
| H | 2.02312400  | -1.82214600 | -0.84824200 |

**TS2-b2**

|   |             |             |             |
|---|-------------|-------------|-------------|
| C | 0.37008600  | 1.03559500  | -0.80355900 |
| C | -1.02267600 | 1.58722900  | -0.84515900 |
| C | -1.61998300 | 1.47389300  | 0.52842700  |
| C | -2.27018400 | 0.39580000  | 0.96006500  |
| C | -2.50400500 | -0.80304600 | 0.15519600  |
| C | 0.68609500  | -0.30883400 | -1.12848300 |
| C | -0.10732800 | -1.43353600 | -0.52557100 |
| C | -1.60570800 | -1.51868700 | -0.52206500 |
| O | 1.29009100  | 1.67903000  | -0.23054800 |
| O | 1.92983700  | -0.58478100 | -1.02680700 |
| C | 2.04220800  | 0.60120500  | 1.19448000  |
| C | 1.91290000  | -0.75392300 | 0.84004300  |
| C | 0.56045900  | -1.40467300 | 0.94505700  |
| H | -1.60781800 | 1.01666400  | -1.56151200 |
| H | -0.97958900 | 2.62727200  | -1.15697500 |
| H | -1.50222300 | 2.31932700  | 1.19053000  |
| H | -2.72348300 | 0.42179100  | 1.94271400  |
| H | -3.53204700 | -1.14138800 | 0.11418100  |
| H | 0.27082800  | -2.33917300 | -0.98730100 |
| H | -1.99733200 | -2.35231300 | -1.08901900 |
| H | 1.30501700  | 1.05442400  | 1.83714400  |
| H | 3.02544100  | 1.04022200  | 1.21651000  |
| H | 2.79771300  | -1.36679600 | 0.84967600  |
| H | -0.09123100 | -0.83674300 | 1.60036500  |
| H | 0.62411000  | -2.42341700 | 1.31194500  |

**TS1-c1**

|   |             |             |             |
|---|-------------|-------------|-------------|
| C | 1.44623700  | 1.44887600  | 1.12392800  |
| C | 1.23956100  | 0.13835400  | 1.49428900  |
| C | -1.46505800 | 0.87224000  | -1.01436400 |
| C | -1.97568200 | -0.09542000 | 0.04410300  |
| H | 1.96346900  | -0.36296400 | 2.12084200  |
| H | -1.49590900 | 0.34365600  | -1.96881500 |
| H | 2.34276000  | 1.95237900  | 1.45867500  |
| H | -2.21605300 | 1.65874900  | -1.08451500 |
| C | 0.75336100  | 2.06860100  | 0.07642600  |
| H | 1.22921900  | 2.98776200  | -0.24292200 |
| C | -0.09938900 | 1.56069000  | -0.90986800 |

|   |             |             |             |
|---|-------------|-------------|-------------|
| H | -0.04260100 | 2.18987300  | -1.79305700 |
| O | -3.09384300 | -0.06342000 | 0.47805500  |
| C | -0.82637100 | -0.90670900 | 0.52777900  |
| O | -0.35576000 | -1.79601400 | -0.35272300 |
| C | -0.18187200 | -0.24212200 | 1.48653000  |
| H | -0.81717300 | 0.45481900  | 2.01851900  |
| C | 1.04485400  | -2.07831100 | -0.22601500 |
| H | 1.23282900  | -2.86397200 | -0.95127100 |
| H | 1.24708100  | -2.45822700 | 0.77388600  |
| C | 1.80710700  | -0.82287100 | -0.52727200 |
| H | 2.82258200  | -0.75465300 | -0.17722500 |
| C | 1.37471500  | -0.03698600 | -1.56779800 |
| H | 0.58744900  | -0.40418500 | -2.20686400 |
| H | 2.03839700  | 0.69419200  | -1.99633700 |

### TS1-c2

|   |             |             |             |
|---|-------------|-------------|-------------|
| C | 1.74791800  | -1.17761000 | 0.38628000  |
| C | 0.83967400  | -1.37272200 | 1.43131000  |
| C | 0.58774100  | 1.63946700  | -0.87880500 |
| C | -0.32641400 | 1.37578000  | 0.28520900  |
| H | 1.00611100  | -2.26494200 | 2.01853100  |
| H | 0.22279100  | 1.13571100  | -1.76998800 |
| H | 2.45210300  | -1.99863200 | 0.32398700  |
| H | 0.55412400  | 2.71068900  | -1.04721000 |
| C | 2.41145400  | 0.05309600  | -0.08569800 |
| H | 3.48846400  | -0.03287700 | 0.00208000  |
| C | 1.99182500  | 1.22000600  | -0.56371000 |
| H | 2.74901600  | 1.96367800  | -0.76170500 |
| O | -0.67914200 | 2.27004900  | 1.00970200  |
| C | -0.93528900 | 0.01890000  | 0.59949800  |
| O | -2.30363300 | 0.06150600  | 0.27867700  |
| C | -0.42059200 | -0.81524300 | 1.57825100  |
| H | -1.13020900 | -1.30789900 | 2.22775200  |
| C | -2.10994800 | -0.37112700 | -1.08812700 |
| H | -1.90818100 | 0.48303800  | -1.73190100 |
| H | -3.00287500 | -0.88332300 | -1.43299700 |
| C | -0.91917800 | -1.29642500 | -0.89609900 |
| H | -1.25166200 | -2.15510000 | -0.32673000 |
| C | 0.32934200  | -1.45897700 | -1.46023700 |
| H | 0.76113800  | -0.74218800 | -2.13781200 |
| H | 0.74217800  | -2.45147500 | -1.51826400 |

### Int-a

|   |             |             |             |
|---|-------------|-------------|-------------|
| C | 1.64218400  | -1.26795600 | -0.36695800 |
| C | 2.56664900  | -0.19346500 | 0.18922600  |
| C | 1.33475600  | 0.38593700  | 0.94513400  |
| C | 1.16670900  | 1.86053300  | 0.89989500  |
| C | 0.60181400  | 2.43798600  | -0.16069000 |
| C | 0.38749200  | -0.46895700 | 0.02603300  |
| C | -0.10608000 | 0.31189000  | -1.14753400 |
| C | 0.02926700  | 1.63667000  | -1.23522700 |

|   |             |             |             |
|---|-------------|-------------|-------------|
| O | 1.80315900  | -2.35458400 | -0.81969500 |
| O | -0.58929600 | -1.26196100 | 0.63079600  |
| C | -1.75001000 | -0.54486400 | 1.06525100  |
| C | -2.89560100 | -0.73963900 | 0.12518000  |
| C | -3.62844000 | 0.25015200  | -0.35468900 |
| H | 2.91427700  | 0.47373900  | -0.59694000 |
| H | 3.40452700  | -0.54469000 | 0.78071600  |
| H | 1.30102800  | -0.00659500 | 1.95759900  |
| H | 1.52027800  | 2.45301700  | 1.73065700  |
| H | 0.52004800  | 3.51195000  | -0.22407700 |
| H | -0.60400400 | -0.25701200 | -1.91813000 |
| H | -0.34999500 | 2.15084200  | -2.10569100 |
| H | -1.52417300 | 0.51577000  | 1.18049700  |
| H | -2.00024900 | -0.95359200 | 2.04252900  |
| H | -3.11325500 | -1.76675200 | -0.13530200 |
| H | -3.40181200 | 1.27851100  | -0.10997200 |
| H | -4.47001400 | 0.06745400  | -1.00442200 |

### Int-b

|   |             |             |             |
|---|-------------|-------------|-------------|
| C | 0.14756500  | 1.46159900  | 0.16414600  |
| C | 1.64563300  | 1.51947100  | -0.00995900 |
| C | 1.99082900  | 0.64528700  | -1.18830600 |
| C | 2.16037700  | -0.67089300 | -1.13210700 |
| C | 2.06926400  | -1.48092800 | 0.08843800  |
| C | -0.37557900 | 0.42000900  | 1.15723900  |
| C | -0.37126800 | -1.04014400 | 0.75973600  |
| C | 1.02731200  | -1.60795800 | 0.90605700  |
| O | -0.61592700 | 2.17439500  | -0.42991000 |
| O | -0.72943200 | 0.80978700  | 2.23800400  |
| C | -3.09678900 | 0.00995500  | -1.14863000 |
| C | -2.48783200 | -1.00815400 | -0.56477800 |
| C | -1.01144500 | -1.25391700 | -0.62412600 |
| H | 2.13709700  | 1.16049000  | 0.89147300  |
| H | 1.92144700  | 2.55033400  | -0.20752800 |
| H | 2.07565000  | 1.14414300  | -2.14214200 |
| H | 2.44559000  | -1.19089200 | -2.03753600 |
| H | 2.95600600  | -2.05332700 | 0.33277300  |
| H | -0.99406100 | -1.52375000 | 1.50902600  |
| H | 1.16502000  | -2.22767500 | 1.78064200  |
| H | -2.54343300 | 0.73967000  | -1.72074900 |
| H | -4.16188500 | 0.15305200  | -1.05432000 |
| H | -3.06474500 | -1.70811600 | 0.02732800  |
| H | -0.55487300 | -0.60280100 | -1.36444900 |
| H | -0.80733500 | -2.28055500 | -0.92553600 |

### 2

|   |             |             |             |
|---|-------------|-------------|-------------|
| C | 2.00802500  | 0.07992700  | 0.06333000  |
| C | 1.72169300  | -1.18345500 | -0.75274300 |
| C | 0.34191700  | -0.57583300 | -1.11239600 |
| C | -0.97000400 | -1.31646400 | -0.81831900 |
| C | -0.85280800 | -1.99420300 | 0.51358600  |

|   |             |             |             |
|---|-------------|-------------|-------------|
| C | 0.55753800  | 0.53291900  | -0.04945500 |
| C | -0.38299800 | 0.25426200  | 1.14653800  |
| C | -0.53366600 | -1.18286200 | 1.51449500  |
| O | 2.99209200  | 0.57037500  | 0.52113700  |
| O | 0.28162900  | 1.85417700  | -0.42398200 |
| C | -1.10183200 | 2.11334800  | -0.11760400 |
| C | -1.64939200 | 0.79817800  | 0.42774900  |
| C | -2.05110200 | -0.20969800 | -0.67715600 |
| H | 1.67122900  | -2.06854700 | -0.12382700 |
| H | 2.41392700  | -1.34879300 | -1.57193100 |
| H | 0.33468900  | -0.14129300 | -2.10818400 |
| H | -1.23478000 | -2.00737900 | -1.61214500 |
| H | -1.01118000 | -3.05446900 | 0.63349900  |
| H | -0.09880600 | 0.88843800  | 1.98081700  |
| H | -0.40550000 | -1.50996400 | 2.53386200  |
| H | -1.60614300 | 2.44656800  | -1.02079800 |
| H | -1.14678500 | 2.90251500  | 0.63032600  |
| H | -2.46483800 | 0.96535500  | 1.12340100  |
| H | -2.16091000 | 0.30627900  | -1.63020100 |
| H | -3.00490100 | -0.67184900 | -0.44021800 |

**3-b1**

|   |             |             |             |
|---|-------------|-------------|-------------|
| C | -1.54757800 | 0.46179400  | -0.23054400 |
| C | -0.87396900 | 1.78456700  | -0.04419000 |
| C | 0.67004300  | 1.69616300  | -0.07738100 |
| C | 1.21950600  | 1.19896600  | 1.22836300  |
| C | 1.54442300  | -0.06875600 | 1.43754300  |
| C | -1.12044600 | -0.70800800 | 0.65341300  |
| C | -0.09005500 | -1.65369100 | 0.11807700  |
| C | 1.36442800  | -1.09406800 | 0.37620100  |
| O | -2.42028500 | 0.26708100  | -1.03969900 |
| O | -1.63851700 | -0.82699200 | 1.73415100  |
| C | 1.22316300  | 0.90327100  | -1.27791900 |
| C | 1.40171600  | -0.61172700 | -1.09844900 |
| C | 0.19388500  | -1.52881800 | -1.39354500 |
| H | -1.18955300 | 2.18581100  | 0.92014200  |
| H | -1.24007100 | 2.43562100  | -0.83389300 |
| H | 1.00147600  | 2.72570700  | -0.19983800 |
| H | 1.31560400  | 1.91956700  | 2.02842800  |
| H | 1.90255700  | -0.38369900 | 2.40657500  |
| H | -0.29072100 | -2.63548300 | 0.53285300  |
| H | 2.02827600  | -1.93909700 | 0.52675200  |
| H | 2.20580500  | 1.31897300  | -1.48772900 |
| H | 0.60737200  | 1.09630600  | -2.15732200 |
| H | 2.30266400  | -0.90751900 | -1.62588700 |
| H | 0.51801700  | -2.48168900 | -1.79955100 |
| H | -0.60170300 | -1.13337500 | -2.01555100 |

**3-b2**

|   |             |            |             |
|---|-------------|------------|-------------|
| C | 0.38854000  | 0.88375800 | -0.82627500 |
| C | -0.94288000 | 1.53684100 | -0.93561500 |



|   |             |             |             |
|---|-------------|-------------|-------------|
| C | -1.58805000 | 1.55251500  | 0.42284300  |
| C | -2.26637000 | 0.51586900  | 0.90837700  |
| C | -2.51562600 | -0.72930900 | 0.17600000  |
| C | 0.66027000  | -0.40435800 | -1.06308600 |
| C | -0.14182500 | -1.52713300 | -0.44093100 |
| C | -1.64534300 | -1.53143900 | -0.43763800 |
| O | 1.34674300  | 1.60651400  | -0.17963700 |
| O | 1.98394100  | -0.74808900 | -0.75734600 |
| C | 1.91306000  | 0.85387100  | 0.93042000  |
| C | 1.87806600  | -0.66207500 | 0.66867800  |
| C | 0.54619700  | -1.41061200 | 0.97170600  |
| H | -1.55301500 | 0.97557100  | -1.63761900 |
| H | -0.81186200 | 2.54938900  | -1.31118600 |
| H | -1.48323200 | 2.44493500  | 1.02257000  |
| H | -2.74974700 | 0.61518800  | 1.87184800  |
| H | -3.55661200 | -1.02680900 | 0.13272400  |
| H | 0.18383400  | -2.45741700 | -0.89587100 |
| H | -2.07661400 | -2.37667100 | -0.95623900 |
| H | 1.36192200  | 1.12307400  | 1.83011100  |
| H | 2.94075800  | 1.18873700  | 1.01153600  |
| H | 2.73686000  | -1.13709300 | 1.13226300  |
| H | -0.08898600 | -0.84428400 | 1.64604200  |
| H | 0.73498700  | -2.38957800 | 1.40280500  |

#### 4-c1

|   |             |             |             |
|---|-------------|-------------|-------------|
| C | 1.01041200  | 1.60764000  | 1.13257100  |
| C | 1.32761700  | 0.12625900  | 1.19208900  |
| C | -1.45107000 | 0.57946400  | -1.12476400 |
| C | -1.88865300 | -0.30778900 | 0.04499400  |
| H | 2.07115100  | -0.08828200 | 1.95479700  |
| H | -1.48819700 | -0.02801600 | -2.02942600 |
| H | 1.26921800  | 2.22419100  | 1.98106600  |
| H | -2.21590000 | 1.34689800  | -1.20697800 |
| C | 0.27803100  | 2.09381100  | 0.13561500  |
| H | -0.04069600 | 3.12608200  | 0.15372100  |
| C | -0.04297500 | 1.26358900  | -1.08281200 |
| H | -0.09877900 | 1.95670300  | -1.92180300 |
| O | -2.96744000 | -0.22218100 | 0.56728700  |
| C | -0.70434800 | -1.07130200 | 0.50738800  |
| O | -0.10347300 | -1.80844800 | -0.45367100 |
| C | -0.05291600 | -0.43865300 | 1.49011200  |
| H | -0.66140300 | 0.10734500  | 2.19299800  |
| C | 1.31423300  | -1.84638100 | -0.29586200 |
| H | 1.69875100  | -2.34187300 | -1.18018600 |
| H | 1.56404700  | -2.42342100 | 0.59570700  |
| C | 1.78188900  | -0.40930200 | -0.18309200 |
| H | 2.86700900  | -0.37972500 | -0.23188100 |
| C | 1.20099500  | 0.39235500  | -1.36897700 |
| H | 0.99821000  | -0.28380800 | -2.19783700 |
| H | 1.96459700  | 1.09080100  | -1.70268500 |

**4-c2**

|   |             |             |             |
|---|-------------|-------------|-------------|
| C | 1.57681400  | -1.20133700 | 0.09614800  |
| C | 0.93603800  | -1.08332300 | 1.48067700  |
| C | 0.58109500  | 1.61929600  | -0.92427400 |
| C | -0.46308500 | 1.32541000  | 0.13447800  |
| H | 1.55138900  | -1.38959300 | 2.31367200  |
| H | 0.28271900  | 1.14501800  | -1.85887800 |
| H | 2.26452400  | -2.04146000 | 0.13415600  |
| H | 0.54396200  | 2.69395300  | -1.06769700 |
| C | 2.41673700  | 0.04140100  | -0.11311100 |
| H | 3.46210800  | -0.04347000 | 0.14973400  |
| C | 1.98906700  | 1.22010500  | -0.54392400 |
| H | 2.71724600  | 2.01401500  | -0.62022300 |
| O | -0.95031500 | 2.22146300  | 0.77252600  |
| C | -0.94145800 | -0.10350300 | 0.44298900  |
| O | -2.37499800 | -0.12062000 | 0.23477000  |
| C | -0.25653800 | -0.53199700 | 1.69298000  |
| H | -0.67073100 | -0.35250300 | 2.67224000  |
| C | -2.14310500 | -0.67341300 | -1.09755700 |
| H | -2.07804000 | 0.12719700  | -1.83433200 |
| H | -2.90679700 | -1.38965500 | -1.37722600 |
| C | -0.80092200 | -1.20957800 | -0.58739000 |
| H | -1.07379400 | -2.09968200 | -0.02526300 |
| C | 0.59366100  | -1.43869900 | -1.10754000 |
| H | 0.87742000  | -0.79449400 | -1.93171100 |
| H | 0.70267200  | -2.46224400 | -1.45368700 |
